# Supplementary material for: Phylogenetic Relationships and Evolution of the Genus Eganvirus (186-Type) Yersinia pestis Bacteriophages
Source: MDPI journal article supplement (doi:10.3390/v16050748), 2024-05-08
Supplement: s1 [file s1]

[Supplementary S2](#). *Eganvirus* phages and other P2-like phages in NCBI used in phylogenetic analysis.

| No.                                                 | Name           | Known Genus       | Host strain/source                                                                      | Country        | GC (%) | Sequence Size (bp) | Accession No. | Genes Existence |      |             |     | Ref.  |
|-----------------------------------------------------|----------------|-------------------|-----------------------------------------------------------------------------------------|----------------|--------|--------------------|---------------|-----------------|------|-------------|-----|-------|
|                                                     |                |                   |                                                                                         |                |        |                    |               | int             | c/cl | cox/<br>alp | cII |       |
| Bacteriophages 1: genus <i>Eganvirus</i>            |                |                   |                                                                                         |                |        |                    |               |                 |      |             |     |       |
| 1                                                   | 186            | Eganvirus         | <i>Escherichia coli</i>                                                                 | USA            | 53.1   | 30624              | NC_001317     | √               | √    | √           | √   | 1     |
| 2                                                   | EtG            | Eganvirus         | <i>Erwinia tracheiphila</i> Et-B, <i>Cucumis sativus</i>                                | Pakistan       | 54.1   | 30413              | NC_047833     | √               | √    | √           | √   | 8,18  |
| 3                                                   | PsP3           | Eganvirus         | <i>Salmonella enterica</i> subsp. <i>enterica</i>                                       | Potsdam        | 52.8   | 30636              | NC_005340     | √               | √    | √           | √   | 1,13  |
| 4                                                   | SEN1           | Eganvirus         | <i>Salmonella enterica</i> subsp. <i>salamae</i> 10/99 II                               | Czech Republic | 53.0   | 29733              | KT630644.2    | √               | √    | √*          | √   | 9     |
| 5                                                   | SW9            | Eganvirus         | <i>Salmonella</i> sp.                                                                   | Canada         | 53.0   | 31123              | MK972711      | √               | √    | √*          | √   | 14    |
| 6                                                   | BIS20          | Eganvirus         | <i>Salmonella enterica</i> subsp. <i>enterica</i> serovar <i>Typhimurium</i> SE-BS17    | NA             | 53.2   | 29512              | NC_070911     | √               | √    | √           | √   | 15    |
| 7                                                   | SI22           | Eganvirus         | <i>Salmonella</i> sp.                                                                   | Canada         | 53.0   | 30920              | MK972710      | √               | √    | √*          | √   | —     |
| 8                                                   | vB_EcoM-613 R3 | NA                | <i>Escherichia coli</i>                                                                 | United Kingdom | 51.2   | 44992              | ON470592      | √               | √    | √*          | √   | —     |
| 9                                                   | vB_Sal_PHB48   | NA                | <i>Salmonella enterica</i> subsp. <i>enterica</i> serovar <i>Enteritidis</i> CICC 21482 | China          | 52.4   | 29575              | ON782130      | √               | √    | √           | √   | 16    |
| Bacteriophages 2: 186-type phages or P2-like phages |                |                   |                                                                                         |                |        |                    |               |                 |      |             |     |       |
| 1                                                   | ENT90          | Entnonagintavirus | <i>Erwinia amylovora</i>                                                                | China          | 55.8   | 29564              | NC_019932     | √               | √    | √           | √   | 17,18 |
| 2                                                   | Fels-2         | Felsduovirus      | <i>Salmonella typhimurium</i> LT2                                                       | NA             | 52.5   | 33693              | NC_010463     | √               | √    | √           | √   | 1     |
| 3                                                   | SopE ϕ         | Felsduovirus      | <i>Salmonella typhimurium</i> DT204                                                     | —              | 51.3   | 35155              | AY319521      | √               | √    | √           | √   | 1     |
| 4                                                   | 3625_26581     | NA                | Bacteriophage sp. isolate 3625_26581                                                    | Japan          | 54.7   | 27828              | OP075671      | √               | √    | √*          | √   | —     |

|                                                   |           |               |                                                                                                |                    |      |       |                                                   |   |   |   |   |             |
|---------------------------------------------------|-----------|---------------|------------------------------------------------------------------------------------------------|--------------------|------|-------|---------------------------------------------------|---|---|---|---|-------------|
| 5                                                 | K139      | Longwoodvirus | <i>Vibrio cholerae</i> O139                                                                    | NA                 | 48.9 | 33106 | NC_003313                                         | √ | √ | √ | √ | 1,24        |
| 6                                                 | Kappa     | Longwoodvirus | <i>Vibrio cholerae</i> O1 biovar eltor                                                         | NA                 | 48.8 | 33507 | NC_010275                                         |   |   |   |   | 1,23        |
| 7                                                 | φ O18P    | Bielevirus    | <i>Aeromonas media</i>                                                                         | NA                 | 61.7 | 33985 | NC_009542                                         |   |   |   |   | 1,24        |
| 8                                                 | HP1       | Hpunavirus    | <i>Haemophilus influenzae</i>                                                                  | NA                 | 40.0 | 32355 | NC_001697                                         |   |   |   |   | 1,19,20,21  |
| 9                                                 | HP2       | Hpunavirus    | <i>Haemophilus influenzae</i>                                                                  | NA                 | 39.9 | 31508 | NC_003315                                         |   |   |   |   | 1,21        |
| 10                                                | F108      | Irtavirus     | <i>Pasteurella multocida</i>                                                                   | NA                 | 42.1 | 30505 | NC_008193                                         |   |   | — |   | 1,22        |
| <b>Bacteriophages 3: genus <i>Peduvovirus</i></b> |           |               |                                                                                                |                    |      |       |                                                   |   |   |   |   |             |
| 1                                                 | P2        | Peduvovirus   | <i>Escherichia coli</i>                                                                        | NA                 | 50.2 | 33593 | NC_001895                                         | √ | √ | √ | √ | 1,2,4,12,13 |
| 2                                                 | P2_Hy_dis | Peduvovirus   | Recombinant between P2 and a defective P2-like prophage in an <i>Escherichia coli</i> B strain | NA                 | —    | —     | AJ306907-c&cox                                    | √ | √ | √ | √ | 2,7,10,11   |
| 3                                                 | φ D124    | Peduvovirus   | <i>Escherichia coli</i> C, Clinical isolate                                                    | Los Angeles, Calif | —    | —     | AM159060-c&cox,<br>AJ298558-ONML                  | √ | √ | √ | √ | 1,2         |
| 4                                                 | W φ       | Peduvovirus   | <i>Escherichia coli</i> W str. ATCC9637                                                        | NA                 | 51.7 | 32684 | NC_005056                                         | √ | √ | √ | √ | 1,2         |
| 5                                                 | L-413C    | Peduvovirus   | <i>Yersinia pestis</i>                                                                         | NA                 | 52.1 | 30728 | NC_004745                                         | √ | √ | √ | √ | 1,2,4       |
| 6                                                 | φ D160    | Peduvovirus   | <i>Escherichia coli</i> C, Clinical isolate                                                    | Los Angeles, Calif | —    | —     | AM159075-c&cox,<br>AJ298560-ONML                  | √ | √ | √ | √ | 1,2         |
| 7                                                 | φ D145    | Peduvovirus   | <i>Escherichia coli</i> C, Clinical isolate                                                    | Los Angeles, Calif | —    | —     | AM159077-c&cox,<br>AM158280-int,<br>AJ298559-ONML | √ | √ | √ | √ | 1,2         |
| 8                                                 | P2-EC4    | Peduvovirus   | <i>Escherichia coli</i> str. ECOR4                                                             | NA                 | —    | —     | AM159080-c&cox                                    | √ | √ | √ | √ | 2           |
| 9                                                 | GMG73     | Peduvovirus   | <i>Yersinia pestis</i>                                                                         | China              | 51.5 | 33804 | OP880301                                          | √ | √ | √ | √ | 4           |
| 10                                                | GMS190    | Peduvovirus   | <i>Yersinia pestis</i>                                                                         | China              | 53.0 | 29462 | OP880302                                          | √ | √ | √ | √ | 4           |
| 11                                                | HQ103     | Peduvovirus   | <i>Yersinia pestis</i> EV76-CN                                                                 | China              | 51.7 | 31962 | NC_070908                                         | √ | √ | √ | √ | 4,6         |

|                                    |               |                                                                      |                                |         |                    |                        |           |   |   |   |   |      |
|------------------------------------|---------------|----------------------------------------------------------------------|--------------------------------|---------|--------------------|------------------------|-----------|---|---|---|---|------|
| 12                                 | Vb_YpM_22     | Peduvovirus                                                          | <i>Yersinia pestis</i> EV76-CN | China   | 51.5               | 31809                  | NC_055844 | √ | √ | √ | √ | 3,4  |
| 13                                 | Vb_YpM_46     | Peduvovirus                                                          | <i>Yersinia pestis</i> EV76-CN | China   | 51.7               | 32336                  | NC_055845 | √ | √ | √ | √ | 3,4  |
| 14                                 | Vb_YpM_50     | Peduvovirus                                                          | <i>Yersinia pestis</i> EV76-CN | China   | 52.1               | 31096                  | NC_055846 | √ | √ | √ | √ | 3,4  |
| 15                                 | vB_YenM_42.18 | Peduvovirus                                                          | <i>Yersinia enterocolitica</i> | Germany | 46.4               | 36481                  | NC_070913 |   |   |   |   | 5    |
| <b>Bacteriophages 4: Prophages</b> |               |                                                                      |                                |         |                    |                        |           |   |   |   |   |      |
|                                    | Name          | Host strain/source                                                   | Location in host genome        | GC (%)  | Sequence Size (bp) | Sequence accession No. |           |   |   |   |   | Ref. |
| 1                                  | Φ ECA29       | <i>Erwinia carotovora</i> subsp. <i>atroseptica</i> SCRI1043         | 2935258-2966778                | 50.9    | 31521              | NC_004547              |           |   |   |   |   | 1    |
| 2                                  | φ ECO1        | <i>Escherichia coli</i> HS                                           | 916812-948276                  | 52.0    | 31465              | NC_009800              | √         | √ | √ | √ |   | 1    |
| 3                                  | φ ECO2        | <i>Escherichia coli</i> CATCC 8739                                   | 3023202-3058101                | 50.5    | 34900              | NC_010468              | √         | √ | √ | √ |   | 1    |
| 4                                  | φ ECO3        | <i>Escherichia coli</i> CFT073                                       | 908870-942351                  | 50.3    | 33482              | NC_004431              | √         | √ | √ | √ |   | 1    |
| 5                                  | φ ECO4        | <i>Escherichia coli</i> E22                                          | 1631226-1670396                | 51.7    | 39171              | NZ_AAJV000000000       |           |   |   |   |   | 1    |
| 6                                  | φ ECO5        | <i>Escherichia coli</i> UTI89                                        | 903605-951760                  | 53.5    | 32767              | NC_007946              |           |   |   |   |   | 1    |
| 7                                  | φ ECO6        | <i>Escherichia coli</i> 101-1                                        | 908551-947403                  | 52.6    | 38853              | NZ_AAMK000000000       |           |   |   |   |   | 1    |
| 8                                  | φ ECO7        | <i>Escherichia coli</i> 53638                                        | 2139828-2172764                | 51.9    | 32927              | NZ_AAKB000000000       |           |   |   |   |   | 1    |
| 9                                  | φ ESP         | <i>Enterobacter</i> sp. 638                                          | 3783460-3815505                | 53.1    | 32093              | NC_009436              | √         | √ | √ | √ |   | 1    |
| 10                                 | Φ YPS         | <i>Yersinia pseudotuberculosis</i> IP 32953                          | 3688279-3717980                | 49.2    | 29702              | NC_006155              |           |   |   |   |   | 1    |
| 11                                 | Φ YE98        | <i>Yersinia enterocolitica</i> subsp. <i>enterocolitica</i> 8081     | 981219-1012614                 | 48.8    | 31396              | NC_008800              |           |   |   |   |   | 1    |
| 12                                 | φ KPN         | <i>Klebsiella pneumoniae</i> subsp. <i>pneumoniae</i> MGH 78578      | 3803150-3835929                | 52.0    | 32827              | NC_009648              | √         | √ | √ | √ |   | 1    |
| 13                                 | φ SEN1        | <i>Salmonella enterica</i> subsp. <i>enterica</i> serovar Typhi CT18 | 3515381-3549053                | 51.8    | 33673              | NC_003198              | √         | √ | √ | √ |   | 1    |
| 14                                 | φ SEN2        | <i>Salmonella enterica</i> subsp. <i>enterica</i> serovar Typhi CT18 | 4473835-4507389                | 51.7    | 32767              | NC_003198              | √         | √ | √ | √ |   | 1    |

**notes:** "NA" denotes not applicable, "—" indicates the absence of content, "-c&cox" refers to the accession numbers for the C and Cox genes, "-ONML" specifies the accession numbers for the O, N, M, and L genes, while entries without any suffix represent the accession numbers for the complete genome sequences.

## Reference.

1. Phylogenetic structure and evolution of regulatory genes and integrases of P2-like phages
2. Evolution of Immunity and Host Chromosome Integration Site of P2-Like Coliphages
3. Identification and characterization of P2-like bacteriophages of *Yersinia pestis*
4. A temperate P2-like bacteriophage that originated from *Escherichia coli* can infect *Yersinia pestis*
5. Host Range, Morphology and Sequence Analysis of Ten Temperate Phages Isolated from Pathogenic *Yersinia enterocolitica* Strains
6. Temperature-dependent carrier state mediated by H-NS promotes the long-term coexistence of *Y. pestis* and a phage in soil\
7. Characterization of the developmental switch region of bacteriophage P2 Hy dis
8. Complete Genome Sequence of EtG, the First Phage Sequenced from *Erwinia tracheiphila*
9. Phages of *Salmonella enterica* subsp. *salamae* and subsp. *diarizonae*: novel phages with a mosaic genome structure and activity against pathogenic *S. enterica* subsp. *enterica* isolates
10. Electron microscope heteroduplex mapping of P2 Hy dis bacteriophage DNA
11. A variant of phage P2 originating in *Escherichia coli*, strain B
12. Studies on lysogenesis. I. The mode of phage liberation by lysogenic *Escherichia coli*
13. Characterization of five novel endolysins from Gram-negative infecting bacteriophages
14. Genomic Features and Phylogenetic Analysis of Antimicrobial-Resistant *Salmonella* Mbandaka ST413 Strains
15. Phenotypic characterization and genome analysis of a novel *Salmonella* Typhimurium phage having unique tail fiber genes
16. Temperate phage influence virulence and biofilm-forming of *Salmonella* Typhimurium and enhance the ability to contaminate food product
17. Contributions of P2- and P22-like prophages to understanding the enormous diversity and abundance of tailed bacteriophages
18. Novel *Erwinia persicina* Infecting Phage Midgardsormr38 Within the Context of Temperate *Erwinia* Phages
19. *Haemophilus influenzae* HP1 Bacteriophage Encodes a Lytic Cassette with a Pinholin and a Signal-Arrest-Release Endolysin
20. The complete nucleotide sequence of bacteriophage HP1 DNA
21. Bacteriophage HP2 of *Haemophilus influenzae*

22. Isolation and sequencing of a temperate transducing phage for *Pasteurella multocida*
23. Temperature-sensitive mutants of *Serratia* phage Kappa
24. Temperate bacteriophage PhiO18P from an *Aeromonas media* isolate: characterization and complete genome sequence
