# Supplementary figures and images for: Phylogenetic Relationships and Evolution of the Genus Eganvirus (186-Type) Yersinia pestis Bacteriophages
Source: MDPI journal article supplement (doi:10.3390/v16050748), 2024-05-08

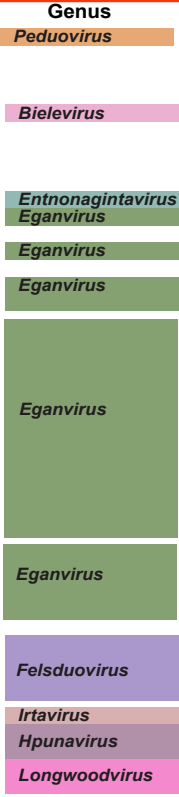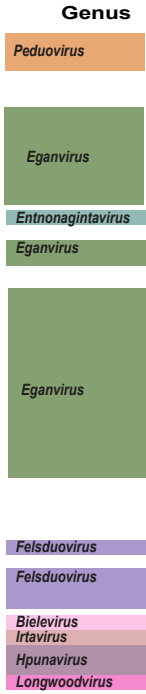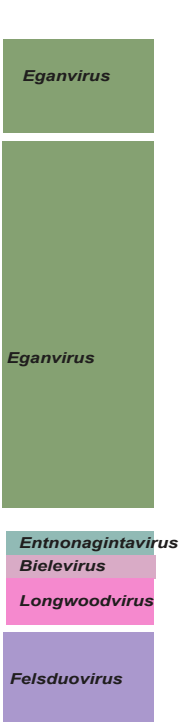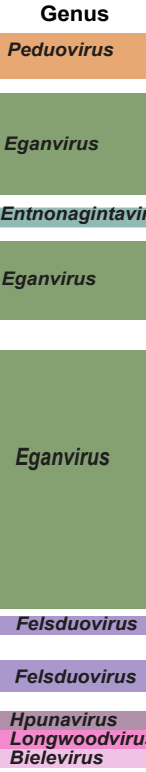

Supplement: s1 [file s1]
